# Supplementary material
Source: PubMed Central journal article supplement (PMC9096864)
Supplement: NIHMS1804078-supplement-Supplement.pdf [file NIHMS1804078-supplement-Supplement.pdf]

## Table of Contents

### Figures

|                                                                                                                                                                                   |                |
|-----------------------------------------------------------------------------------------------------------------------------------------------------------------------------------|----------------|
| <b>Figure S1:</b> Distribution of Recurrence Scores by Menopausal Status.....                                                                                                     | <b>Page 3</b>  |
| <b>Figure S2:</b> Five-year Invasive Disease-Free Survival when defined as<br>a) Premenopausal Women or b) Women Aged 50 or less.....                                             | <b>Page 4</b>  |
| <b>Figure S3:</b> Modeled Five-year Invasive Disease-Free Survival in Premenopausal<br>Women by Treatment Arm and Continuous Recurrence Score.....                                | <b>Page 5</b>  |
| <b>Figure S4:</b> Invasive Disease-Free Survival among Patients with a Recurrence-<br>Score $\leq 25$ in all Participants and by Menopausal Status (Per Protocol Population)..... | <b>Page 6</b>  |
| <b>Figure S5:</b> Invasive Disease-Free Survival Stratified by Recurrence Score Category and<br>Menopausal Status in a Post-Hoc Analysis.....                                     | <b>Page 9</b>  |
| <b>Figure S6:</b> Invasive Disease-Free Survival Stratified by Number of Nodes and<br>Menopausal Status.....                                                                      | <b>Page 13</b> |
| <b>Figure S7:</b> Forest Plot of Invasive Disease-Free Survival with Additional Subgroups....                                                                                     | <b>Page 17</b> |

### Tables

|                                                                                                                                                                           |                |
|---------------------------------------------------------------------------------------------------------------------------------------------------------------------------|----------------|
| <b>Table S1:</b> Baseline Participant Characteristics with Additional Variables.....                                                                                      | <b>Page 19</b> |
| <b>Table S2:</b> Treatment Administered and Exploratory Analyses within Treatment Arm.....                                                                                | <b>Page 21</b> |
| <b>Table S3:</b> Analysis of Invasive Disease-Free Survival in the Overall Population.....                                                                                | <b>Page 23</b> |
| <b>Table S4:</b> Analysis of Invasive Disease-Free Survival in the Postmenopausal<br>Population.....                                                                      | <b>Page 24</b> |
| <b>Table S5:</b> Analysis of Invasive Disease-Free Survival in the Premenopausal<br>Population.....                                                                       | <b>Page 25</b> |
| <b>Table S6:</b> Baseline Characteristics by Menopausal Status.....                                                                                                       | <b>Page 26</b> |
| <b>Table S7:</b> Type of First Invasive Disease-Free Survival Event by Treatment Assigned<br>for Randomized Postmenopausal Patients with Recurrence Score 25 or less..... | <b>Page 28</b> |
| <b>Table S8:</b> Type of First Invasive Disease-Free Survival Event by Treatment Assigned for<br>Randomized Premenopausal Patients with Recurrence-Score 25 or less.....  | <b>Page 29</b> |
| <b>Table S9:</b> Any Invasive Disease-Free Survival Event by Treatment Assigned for<br>Randomized Patients with Recurrence-Score 25 or less.....                          | <b>Page 30</b> |
| <b>Table S10:</b> Number of Patients with a Given Type and Grade of Adverse Event                                                                                         |                |

Postmenopausal Patients.....**Page 31**

**Table S11:** Number of Patients with a Given Type and Grade of Adverse Event

Pre-menopausal Patients.....**Page 34**

**Figure S1.** Distribution of Recurrence Scores by Menopausal Status

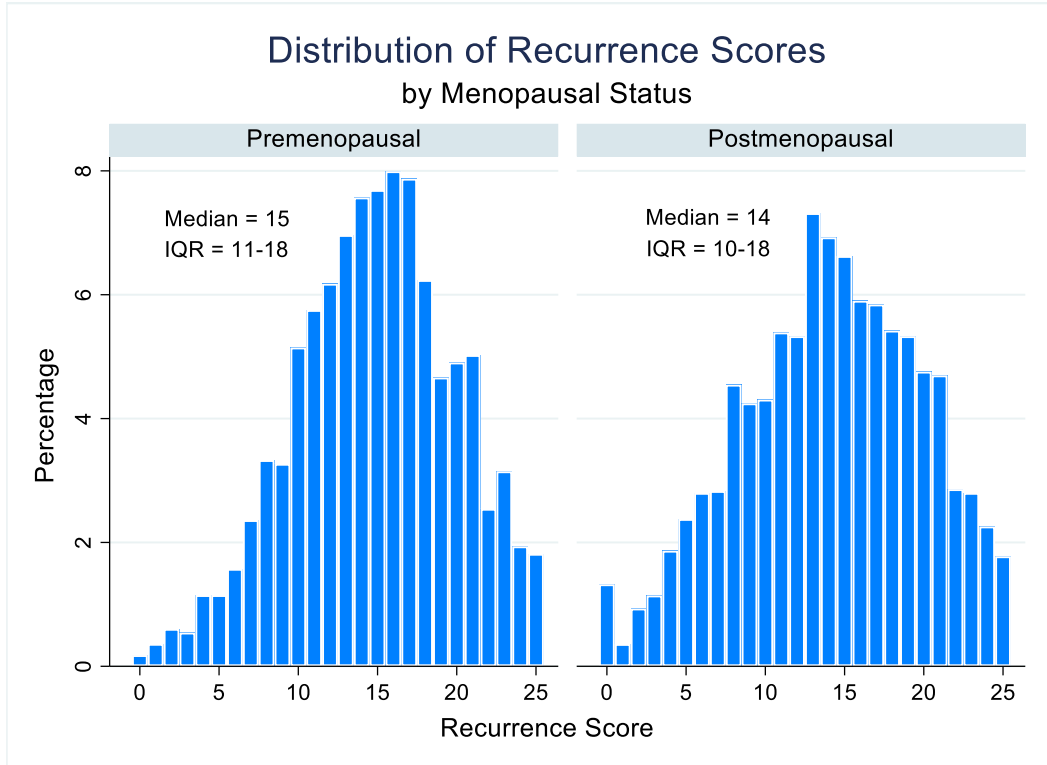

**Figure S2.** Five-year Invasive Disease-Free Survival when defined as a) Premenopausal Women or b) Women Aged 50 or less

A.

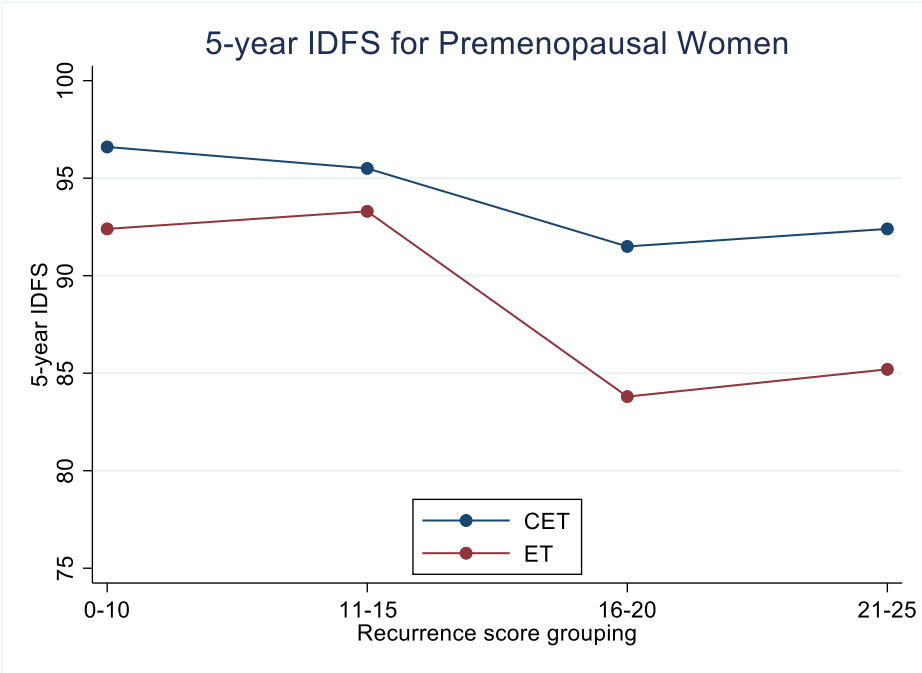

B.

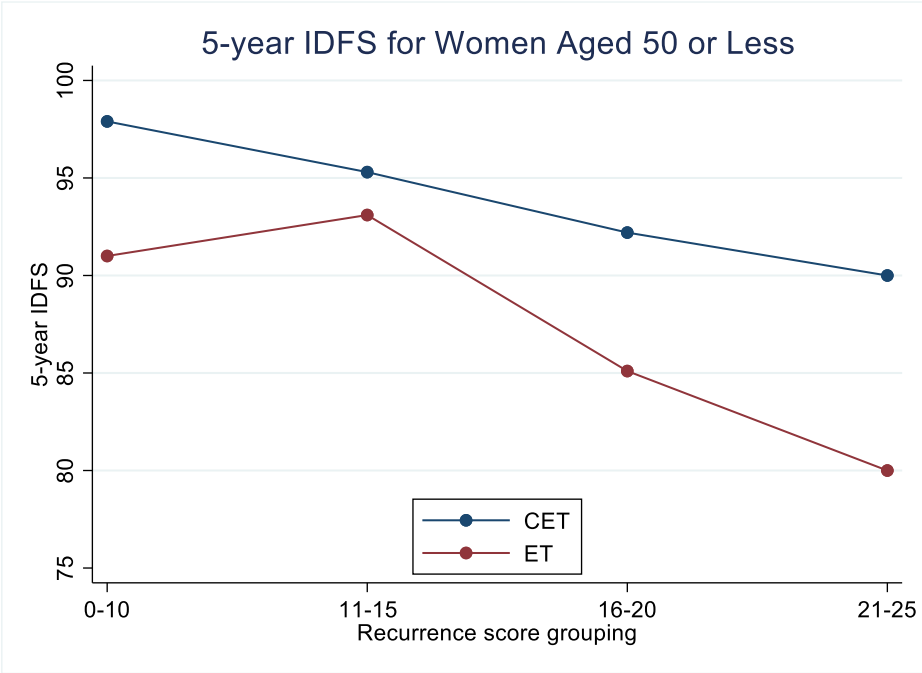

**Figure S3.** Modeled 5-year IDFS Event Rates for Premenopausal Women by Assigned Treatment Arm

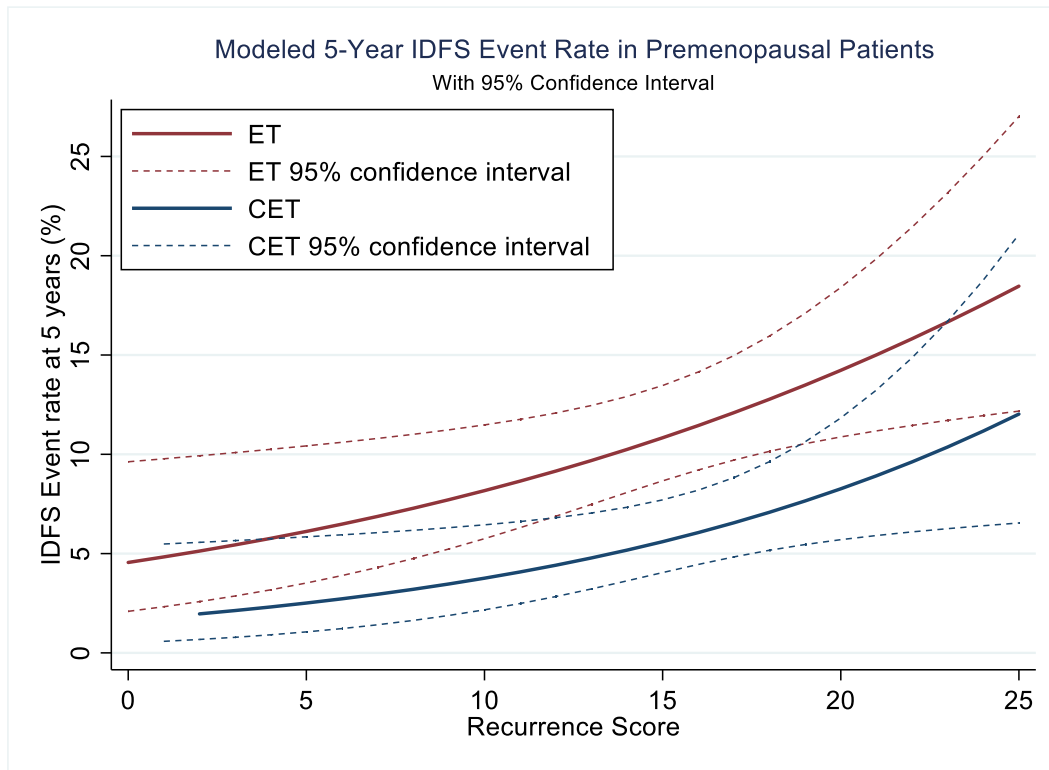

Based on flexible parametric modeling using proportional odds link and model terms for assigned treatment arm, continuous Recurrence Score, and the interaction of treatment arm and RS.

Royston P, Parmar MK. Flexible parametric proportional-hazards and proportional-odds models for censored survival data, with application to prognostic modelling and estimation of treatment effects. *Stat Med.* 2002 Aug 15;21(15):2175-97. doi: 10.1002/sim.1203. PMID: 12210632.

**Figure S4.** Invasive Disease-Free Survival among Patients with a Recurrence-Score  $\leq 25$  in all Participants and by Menopausal Status (Per Protocol Population)

4A. Invasive Disease-Free Survival in All Participants by Treatment Arm

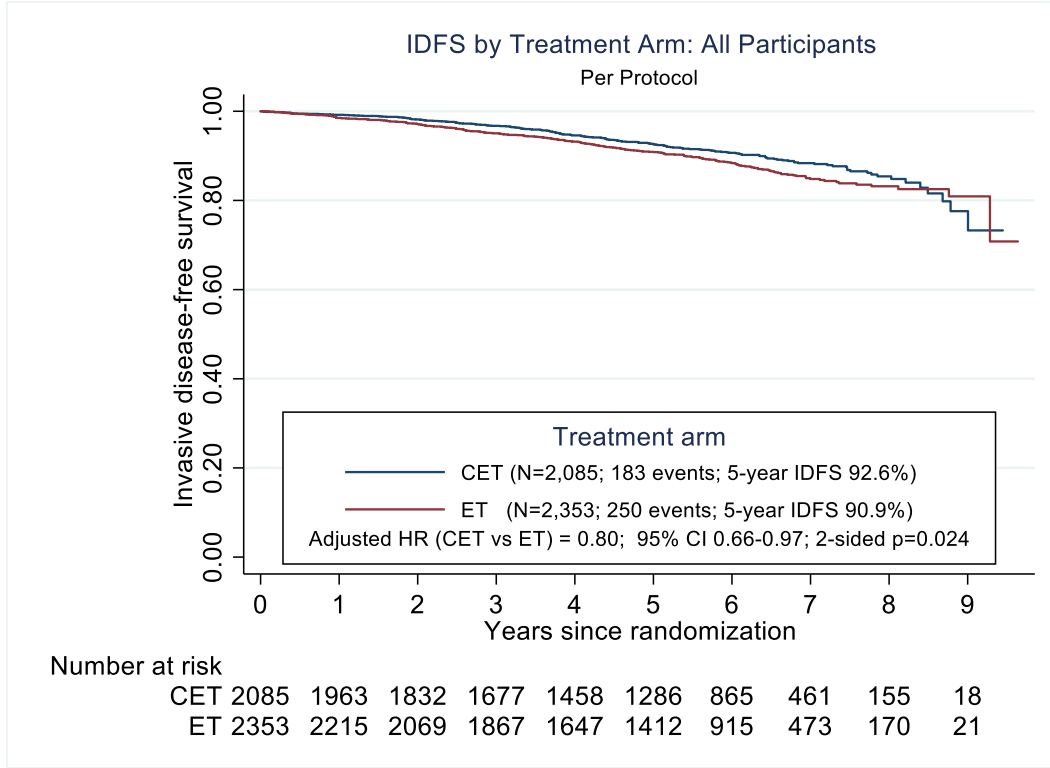

| Treatment | Accepted assigned treatment | Did not accept assigned treatment | Total |
|-----------|-----------------------------|-----------------------------------|-------|
| ET        | 2,353 (94.2%)               | 144 (5.8%)                        | 2,497 |
| CET       | 2,085 (83.8%)               | 402 (16.2%)                       | 2,487 |
| Overall   | 4,438 (89.0%)               | 546 (11.0%)                       | 4,984 |

4B. Invasive Disease-Free Survival in Postmenopausal Women by Treatment Arm

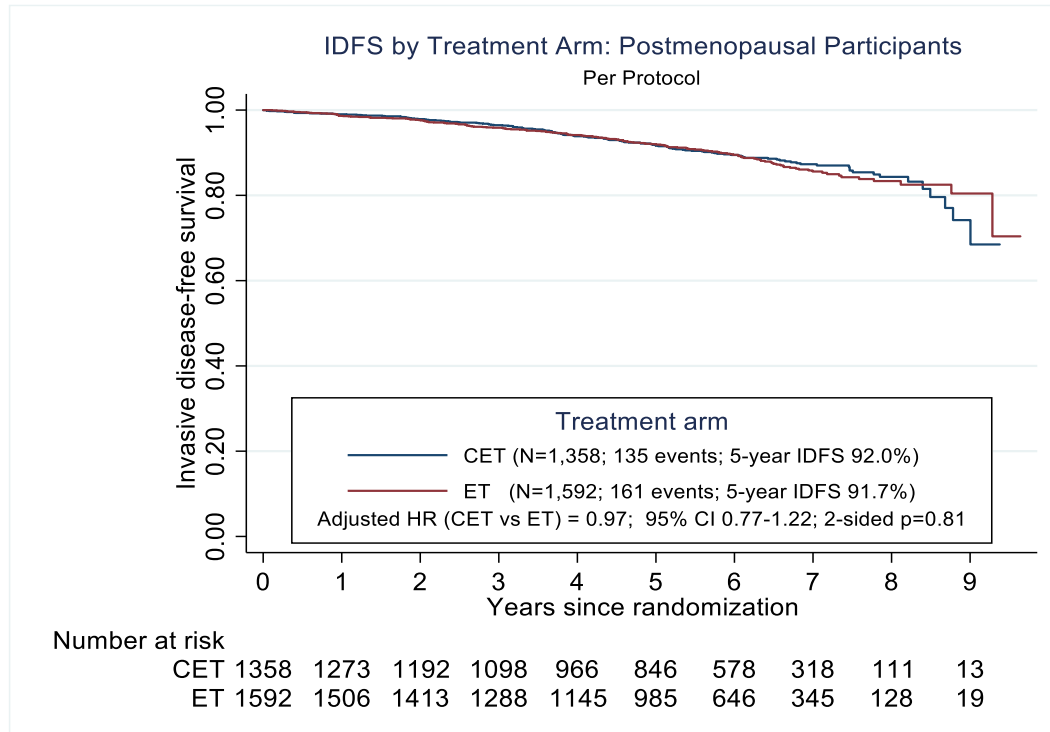

| Treatment | Accepted assigned treatment | Did not accept assigned treatment* | Total |
|-----------|-----------------------------|------------------------------------|-------|
| ET        | 1,592 (95.3%)               | 79 (4.7%)                          | 1,671 |
| CET       | 1,358 (81.9%)               | 300 (18.1%)                        | 1,658 |
| Overall   | 2,950 (88.6%)               | 379 (11.4%)                        | 3,329 |

#### 4C. Invasive Disease-Free Survival in Premenopausal Women by Treatment Arm

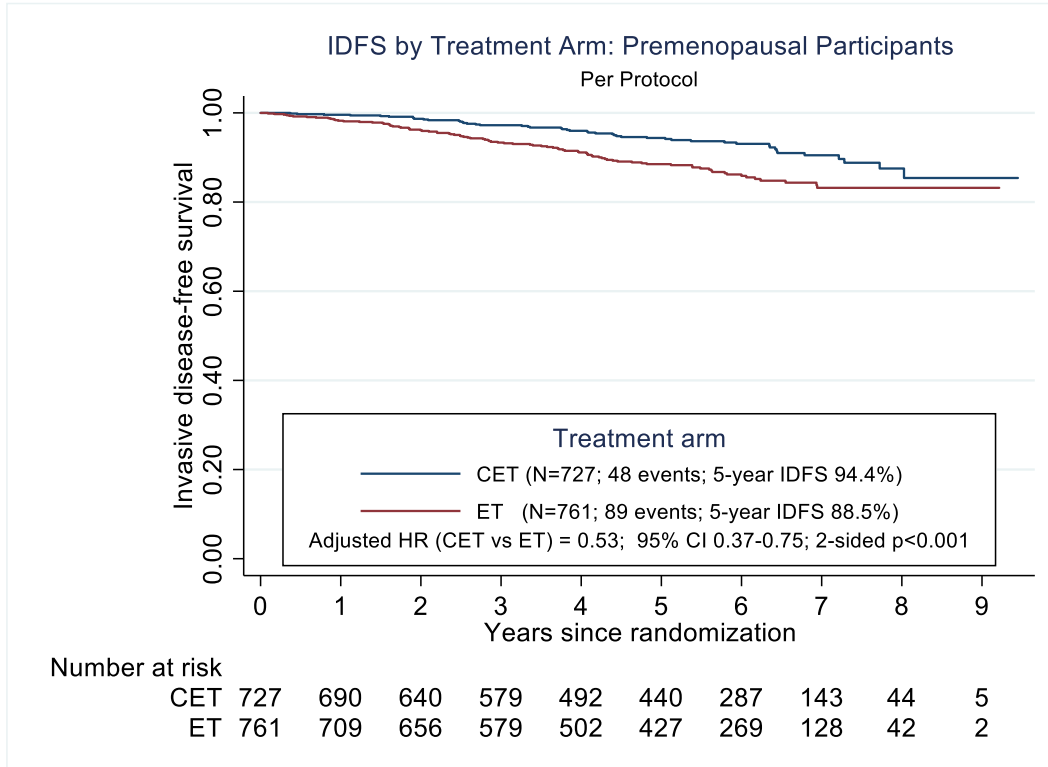

| Treatment | Accepted assigned treatment | Did not accept assigned treatment | Total |
|-----------|-----------------------------|-----------------------------------|-------|
| ET        | 761 (92.1%)                 | 65 (7.9%)                         | 826   |
| CET       | 727 (87.7%)                 | 102 (12.3%)                       | 829   |
| Overall   | 1,488 (89.9%)               | 167 (10.1%)                       | 1,655 |



**Figure S5.** Invasive Disease-Free Survival Stratified by Recurrence Score Category and Menopausal Status in a Post-Hoc Analysis

5A. Invasive Disease-Free Survival in Postmenopausal Patients with Recurrence Score 0-13

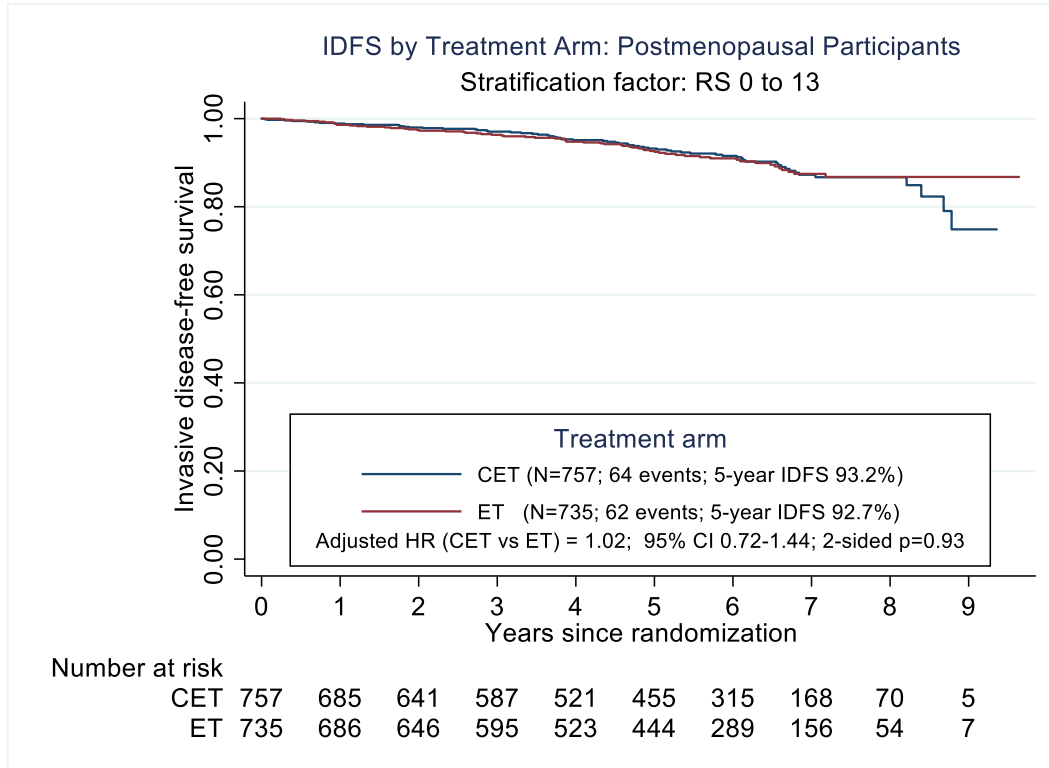

5B. Invasive Disease-Free Survival in Postmenopausal Patients with Recurrence Score 14-25

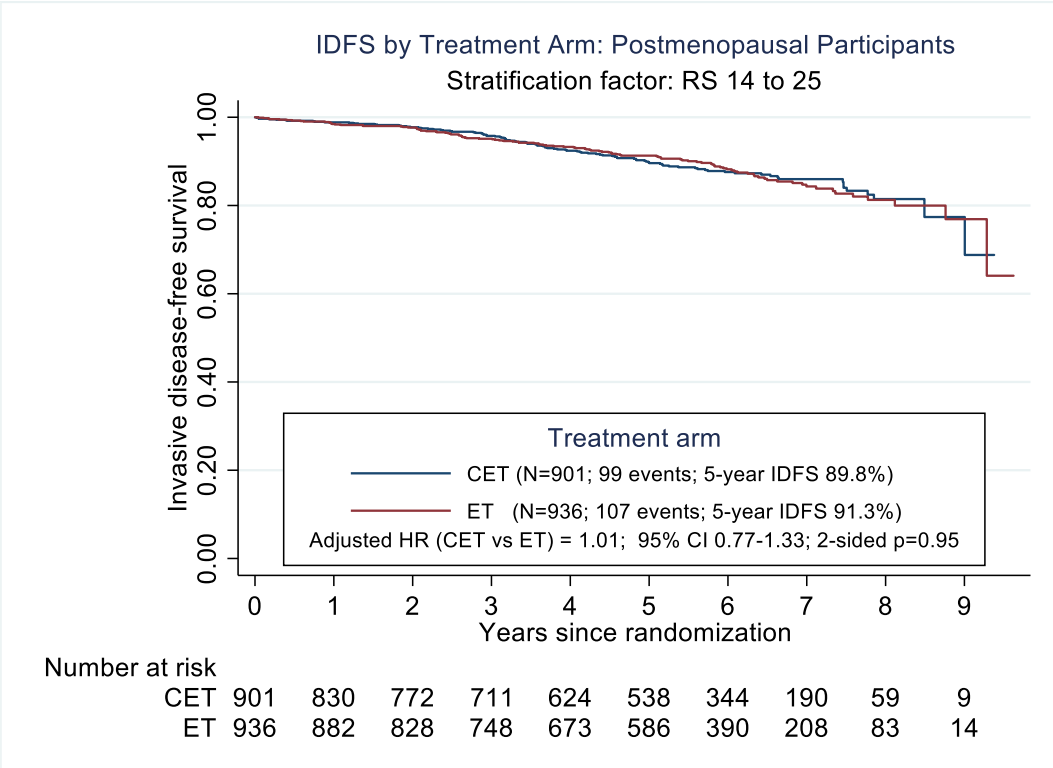

5C. Invasive Disease-Free Survival in Premenopausal Patients with Recurrence Score 0-13

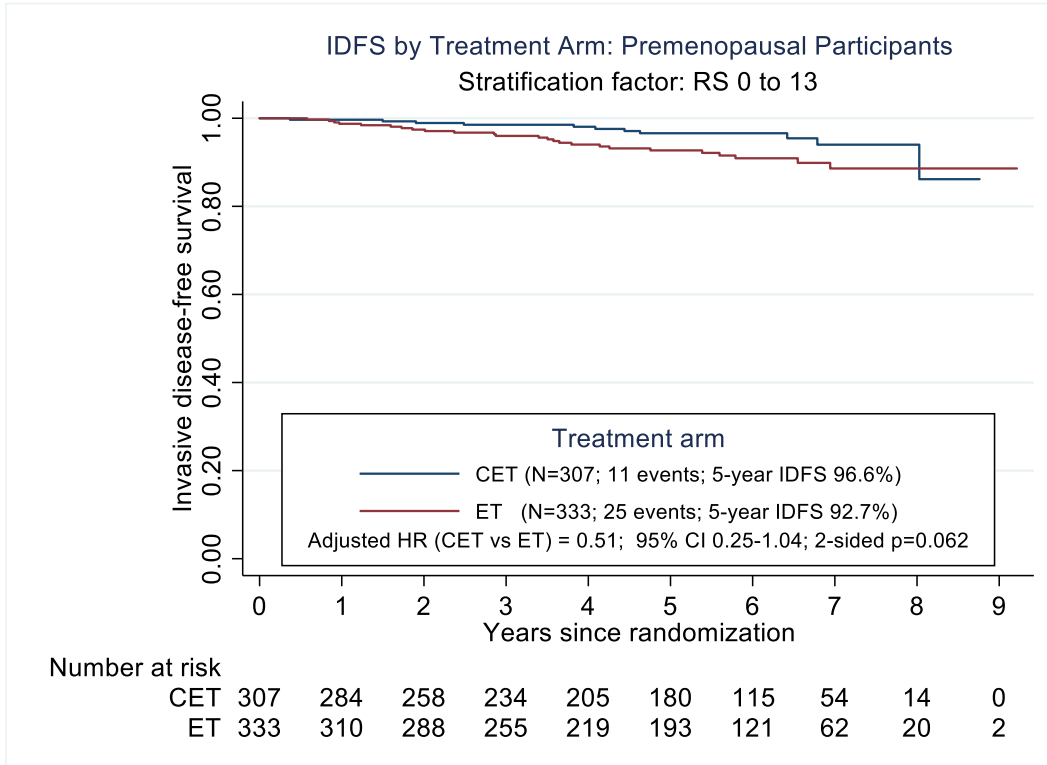

5D. Invasive Disease-Free Survival in Premenopausal Patients with Recurrence Score 14-25

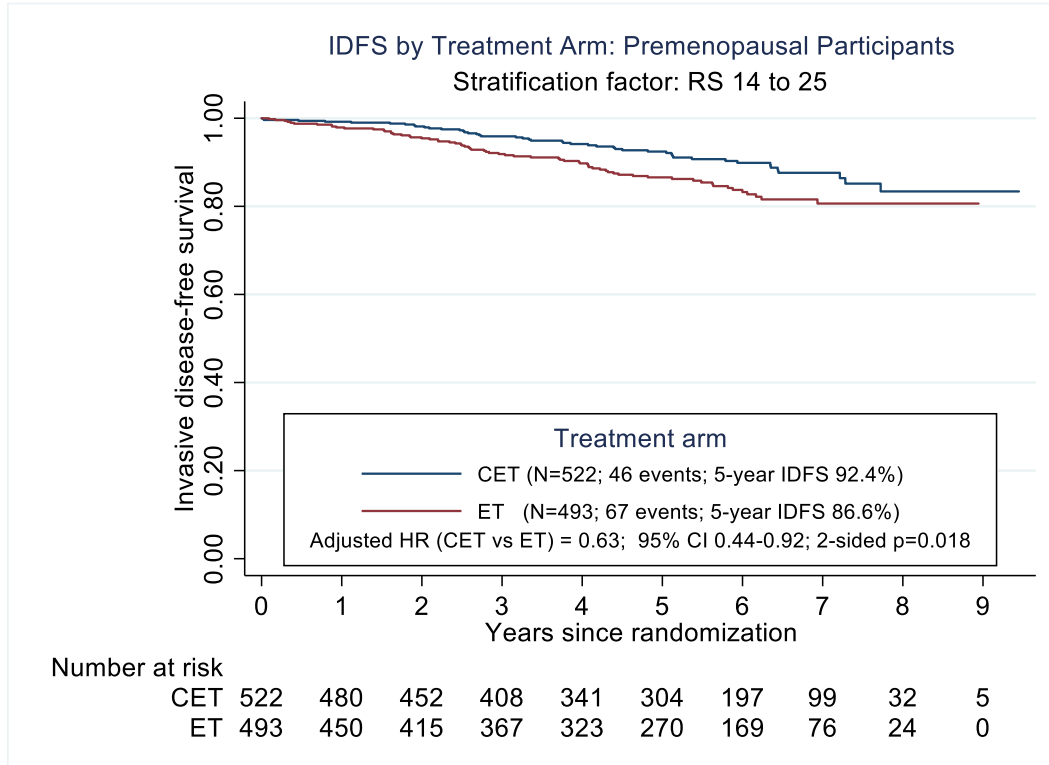

**Figure S6.** Invasive Disease-Free Survival Stratified by Number of Nodes and Menopausal Status

S6A. Invasive Disease-Free Survival in Postmenopausal Patients with 1 Lymph Node

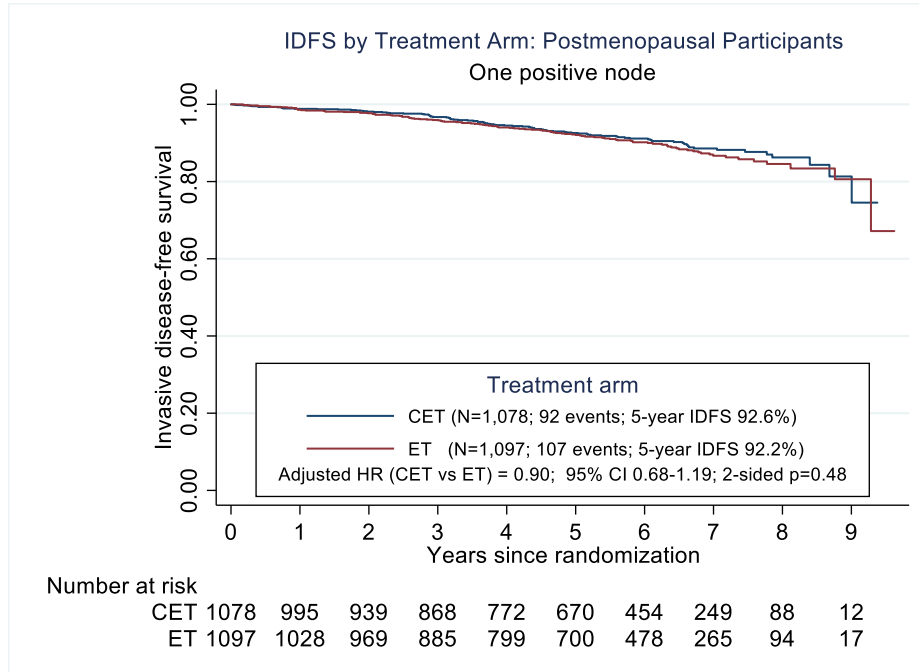

6B. Invasive Disease-Free Survival in Postmenopausal Patients with 2-3 Lymph Nodes

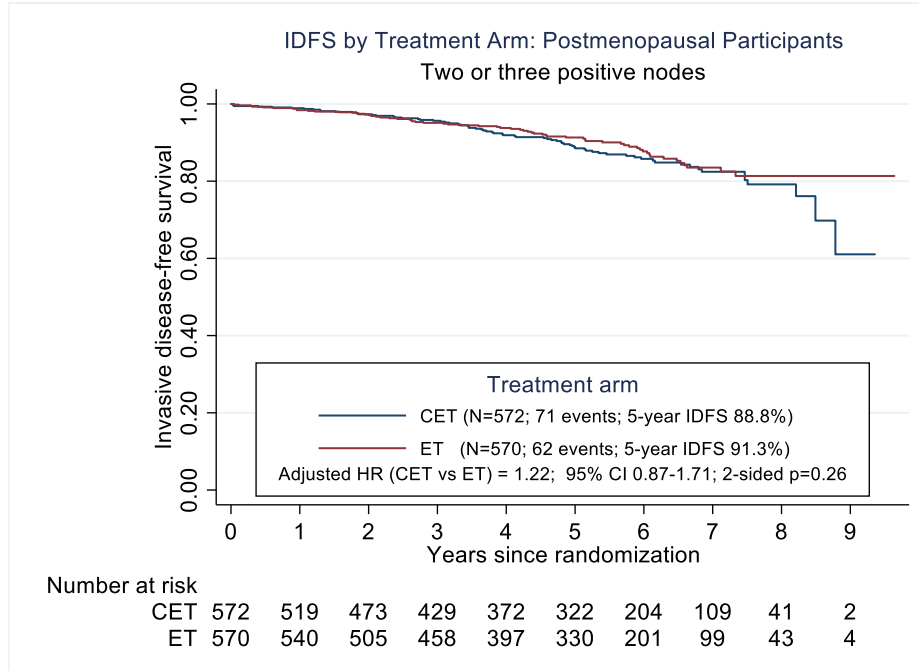

6C. Invasive Disease-Free Survival in Premenopausal Patients with 1 Lymph Node

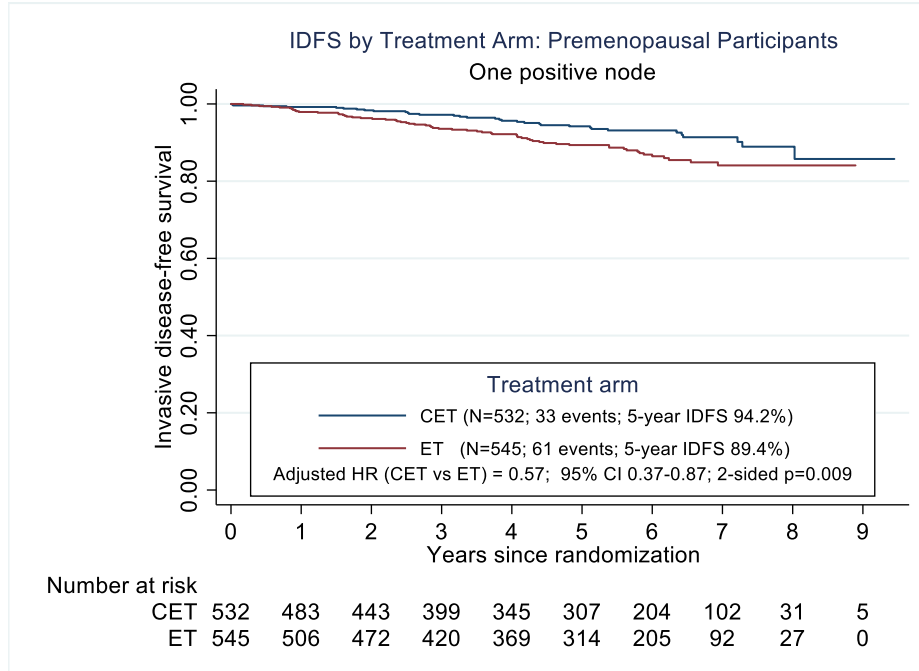

### 6D. Invasive Disease-Free Survival in Premenopausal Patients with 2-3 Lymph Nodes

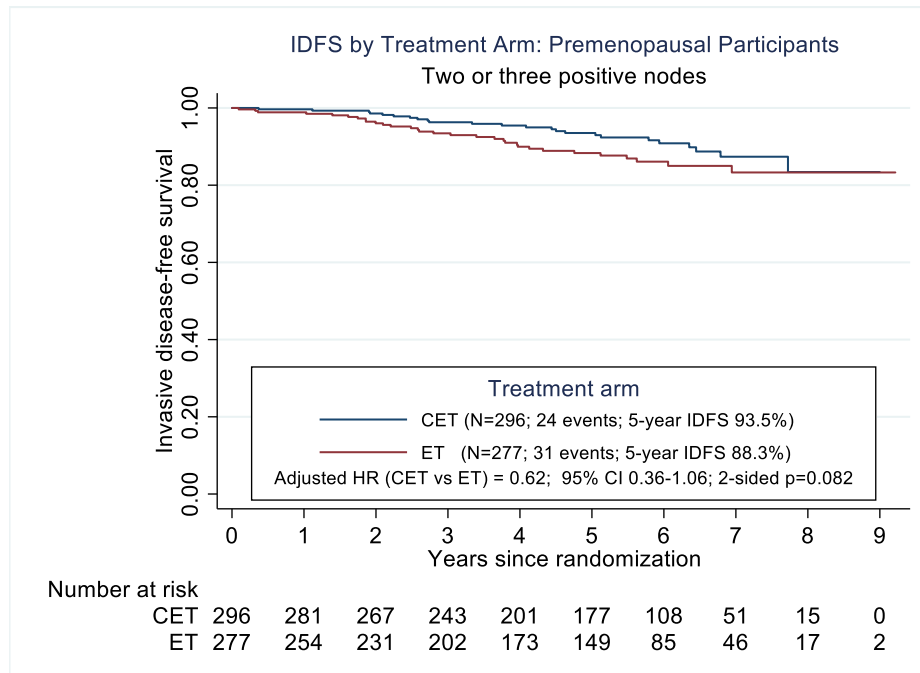



**Figure S7.** Forest Plot of Invasive Disease-Free Survival with Additional Subgroups

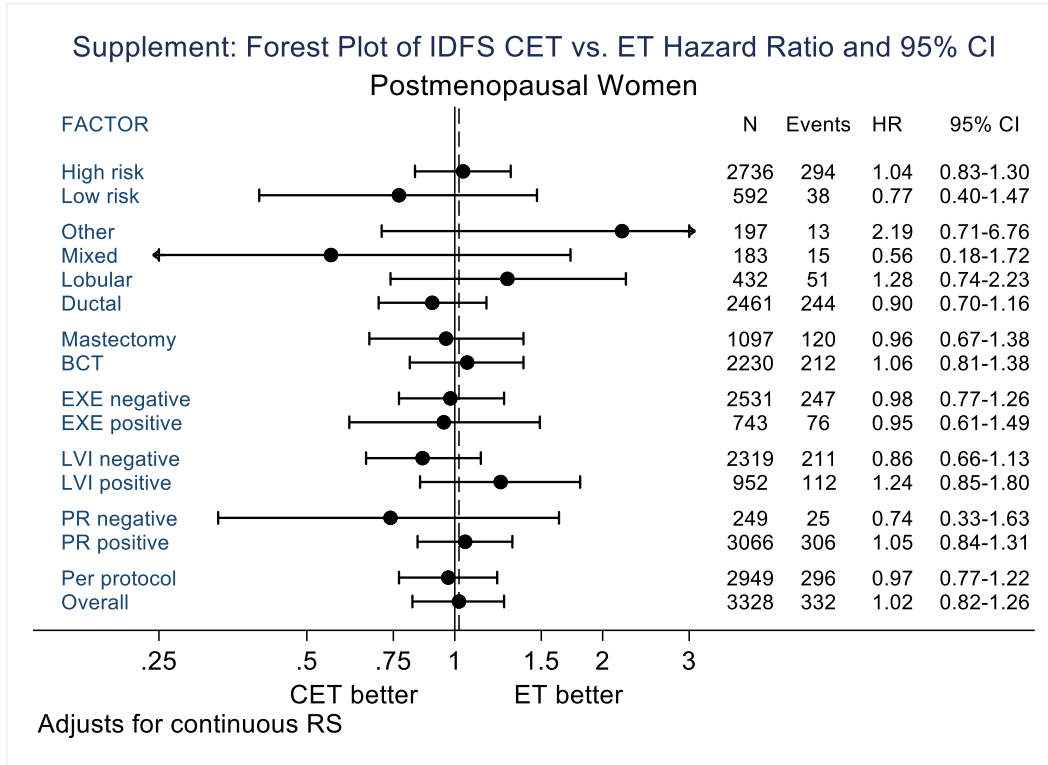

Low risk is tumor size < 2cm AND Grade 1, using a modified version of Adjuvant! Online. High risk is everything else

Arrowheads indicate that the confidence interval extends beyond the boundaries of the 0.25 to 3.0 range

Supplement: Forest Plot of IDFS CET vs. ET Hazard Ratio and 95% CI  
 Premenopausal Women

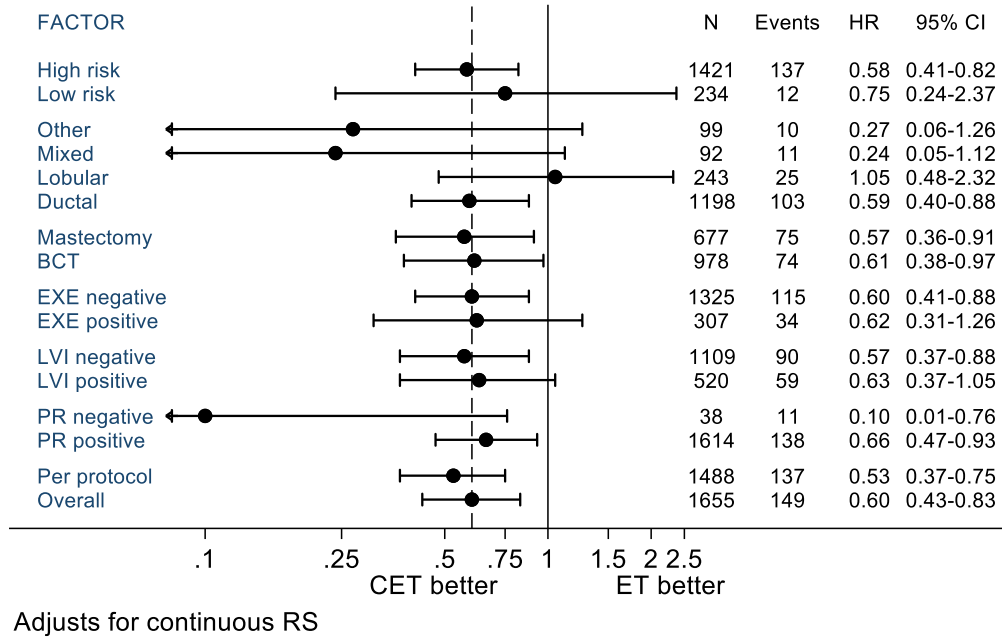

Low risk is tumor size < 2cm AND Grade 1, using a modified version of Adjuvant! Online. High risk is everything else

Arrowheads indicate that the lower confidence bound is below the minimum value for the graph

**Table S1.** Baseline Participant Characteristics with Additional Variables

|                                                                        | <b>Total<br/>(n=5018)</b> |       | <b>Endocrine<br/>Therapy<br/>Alone<br/>(n=2507)</b> |       | <b>Chemo and<br/>Endocrine<br/>Therapy<br/>(n=2511)</b> |       |
|------------------------------------------------------------------------|---------------------------|-------|-----------------------------------------------------|-------|---------------------------------------------------------|-------|
| <b>RACE</b>                                                            |                           |       |                                                     |       |                                                         |       |
| White                                                                  | 3295                      | 65.7% | 1628                                                | 64.9% | 1667                                                    | 66.4% |
| Black                                                                  | 251                       | 5.0%  | 121                                                 | 4.8%  | 130                                                     | 5.2%  |
| Asian                                                                  | 324                       | 6.5%  | 170                                                 | 6.8%  | 154                                                     | 6.1%  |
| Other/Unknown                                                          | 1148                      | 22.9% | 588                                                 | 23.5% | 560                                                     | 22.3% |
| <b>ETHNICITY</b>                                                       |                           |       |                                                     |       |                                                         |       |
| Hispanic                                                               | 622                       | 12.4% | 325                                                 | 13.0% | 297                                                     | 11.8% |
| Non-Hispanic                                                           | 3426                      | 68.3% | 1695                                                | 67.6% | 1731                                                    | 68.9% |
| Unknown                                                                | 970                       | 19.3% | 487                                                 | 19.4% | 483                                                     | 19.2% |
| <b>MEDIAN AGE (RANGE)</b>                                              |                           |       |                                                     |       |                                                         |       |
|                                                                        | 57.5 (18.3 – 87.6)        |       | 57.2 (18.3 – 86.0)                                  |       | 57.9 (28.0 – 87.6)                                      |       |
| <b>AGE CATEGORY</b>                                                    |                           |       |                                                     |       |                                                         |       |
| < 40 years                                                             | 147                       | 2.9%  | 80                                                  | 3.2%  | 67                                                      | 2.7%  |
| 40-49 years                                                            | 1077                      | 21.5% | 547                                                 | 21.8% | 530                                                     | 21.1% |
| 50-59 years                                                            | 1675                      | 33.4% | 838                                                 | 33.4% | 837                                                     | 33.3% |
| 60-69 years                                                            | 1538                      | 30.6% | 761                                                 | 30.4% | 777                                                     | 30.9% |
| ≥ 70 years                                                             | 581                       | 11.6% | 281                                                 | 11.2% | 300                                                     | 12.0% |
| <b>MENOPAUSAL STATUS</b>                                               |                           |       |                                                     |       |                                                         |       |
| Pre-menopausal                                                         | 1665                      | 33.2% | 831                                                 | 33.2% | 834                                                     | 33.2% |
| Post-menopausal                                                        | 3353                      | 66.8% | 1676                                                | 66.8% | 1677                                                    | 66.8% |
| <b>RECURRENCE SCORE</b>                                                |                           |       |                                                     |       |                                                         |       |
| 0-13                                                                   | 2147                      | 42.8% | 1071                                                | 42.7% | 1076                                                    | 42.9% |
| 14-25                                                                  | 2871                      | 57.2% | 1436                                                | 57.3% | 1435                                                    | 57.1% |
| <b>AXILLARY SURGERY</b>                                                |                           |       |                                                     |       |                                                         |       |
| Axillary lymph node dissection (with or without sentinel node mapping) | 3140                      | 62.6% | 1571                                                | 62.7% | 1569                                                    | 62.5% |
| Sentinel node biopsy without axillary lymph node dissection            | 1878                      | 37.4% | 936                                                 | 37.3% | 942                                                     | 37.5% |
| <b>HORMONE RECEPTOR STATUS</b>                                         |                           |       |                                                     |       |                                                         |       |
| ER+ and PR+                                                            | 4701                      | 94.3% | 2349                                                | 94.2% | 2352                                                    | 94.3% |
| ER+ and PR-                                                            | 286                       | 5.7%  | 144                                                 | 5.8%  | 142                                                     | 5.7%  |
| Not reported                                                           | 31                        |       |                                                     |       |                                                         |       |
| <b>TUMOR SIZE</b>                                                      |                           |       |                                                     |       |                                                         |       |
| T1                                                                     | 2923                      | 58.3% | 1470                                                | 58.6% | 1453                                                    | 57.9% |
| T2                                                                     | 1843                      | 36.7% | 912                                                 | 36.4% | 931                                                     | 37.1% |
| T3                                                                     | 252                       | 5.0%  | 125                                                 | 5.0%  | 127                                                     | 5.1%  |

|                               | <b>Total</b>    |       | <b>Endocrine Therapy Alone</b> |       | <b>Chemo and Endocrine Therapy</b> |       |
|-------------------------------|-----------------|-------|--------------------------------|-------|------------------------------------|-------|
|                               | <b>(n=5018)</b> |       | <b>(n=2507)</b>                |       | <b>(n=2511)</b>                    |       |
| <b>HISTOLOGIC GRADE</b>       |                 |       |                                |       |                                    |       |
| Low                           | 1218            | 24.3% | 607                            | 24.3% | 611                                | 24.4% |
| Intermediate                  | 3215            | 64.3% | 1580                           | 63.2% | 1635                               | 65.3% |
| High                          | 507             | 10.1% | 279                            | 11.2% | 228                                | 9.1%  |
| Unknown                       | 63              | 1.3%  | 34                             | 1.4%  | 29                                 | 1.2%  |
| Not reported                  | 15              |       |                                |       |                                    |       |
| <b>HISTOLOGY</b>              |                 |       |                                |       |                                    |       |
| Invasive ductal carcinoma     | 3673            | 74.6% | 1840                           | 74.8% | 1833                               | 74.4% |
| Invasive lobular carcinoma    | 674             | 13.7% | 316                            | 12.9% | 358                                | 14.5% |
| Invasive mixed ductal/lobular | 278             | 5.6%  | 146                            | 5.9%  | 132                                | 5.4%  |
| Other                         | 299             | 6.1%  | 157                            | 6.4%  | 142                                | 5.8%  |
| Not reported                  | 94              |       |                                |       |                                    |       |
| <b>EXTRANODAL EXTENSION</b>   |                 |       |                                |       |                                    |       |
| No/Unknown                    | 3874            | 78.7% | 1932                           | 78.5% | 1942                               | 78.8% |
| Yes                           | 1051            | 21.3% | 528                            | 21.5% | 523                                | 21.2% |
| Not reported                  | 93              |       |                                |       |                                    |       |
| <b>CLINICAL RISK</b>          |                 |       |                                |       |                                    |       |
| High risk                     | 4182            | 83.3% | 2101                           | 83.8% | 2081                               | 82.9% |
| Low risk                      | 836             | 16.7% | 406                            | 16.2% | 430                                | 17.1% |

Clinical Risk: Low risk is tumor size < 2cm AND Grade 1, using a modified version of Adjuvant! Online. High risk is everything else

ER = Estrogen Receptor; PR = Progesterone Receptor

**Table S2.** Treatment Administered and Exploratory Analyses within Treatment Arm

Table S2A. Treatment administered by menopausal status and randomized arm

|                              | Premenopausal          |                   | Postmenopausal         |                   |
|------------------------------|------------------------|-------------------|------------------------|-------------------|
|                              | Chemoendocrine Therapy | Endocrine Therapy | Chemoendocrine Therapy | Endocrine Therapy |
| Total Number                 | 829                    | 826               | 1658                   | 1671              |
| <b>Adjuvant Chemotherapy</b> | (n=721)                | (n=53)            | (n=1332)               | (n=53)            |
| Anthracycline w/o Taxane     | 35 (5%)                | 1 (2%)            | 35 (3%)                | 3 (6%)            |
| Anthracycline and Taxane     | 387 (54%)              | 25 (47%)          | 522 (39%)              | 19 (36%)          |
| Taxane & Cyclophosphamide    | 298 (41%)              | 25 (47%)          | 758 (57%)              | 30 (57%)          |
| Other                        | 1 (<1%)                | 2 (4%)            | 17 (1%)                | 1 (2%)            |
| None/Not Reported            | 108                    | 773               | 326                    | 1618              |
| <b>Endocrine Therapy*</b>    | (n=805)                | (n=810)           | (n=1579)               | (n=1644)          |
| AI                           | 44 (5%)                | 16 (2%)           | 1339 (85%)             | 1414 (86%)        |
| OFS and AI                   | 20 (2%)                | 37 (5%)           | 4 (<1%)                | 8 (<1%)           |
| OFS and Tam                  | 26 (3%)                | 94 (12%)          | 2 (<1%)                | 3 (<1%)           |
| OFS, Tam, and AI             | 5 (1%)                 | 23 (3%)           | 1 (<1%)                | 2 (<1%)           |
| Tam                          | 673 (84%)              | 611 (75%)         | 144 (9%)               | 133 (8%)          |
| Tam and AI                   | 10 (1%)                | 20 (2%)           | 47 (3%)                | 69 (4%)           |
| Other                        | 1 (<1%)                | 1 (<1%)           | 3 (<1%)                | 1 (<1%)           |
| None                         | 26 (3%)                | 8 (1%)            | 39 (2%)                | 14 (1%)           |
| Not Reported                 | 24                     | 16                | 79                     | 27                |

\* During first 12 months after randomization; restricted to patients included in the survival analyses

### Treatment reporting

Chemotherapy type with start and stop dates was expected to be reported for both treatment arms in order to capture any chemotherapy that was administered regardless of treatment arm assignment. Type of endocrine therapy administered was recorded at 6, 12, 18, 24, 30, 36, 48, and 60 months. Use of ovarian function suppression was also recorded at those follow-up visits as well as the occurrence of regular menstrual periods for women who reported being premenopausal at registration for the trial.

### Exploratory analyses of treatment and outcomes

Since all treatment is post-randomization, the analyses must be landmarked to start survival time follow-up after a designated treatment period or alternatively use time-dependent Cox regression analyses. Given that current median follow-up is only 5.1 years, extensive analyses of endocrine use requires additional follow-up. Below, 12-month landmarked analyses of some treatment comparisons are presented based only on treatment within the first year. These analyses are exploratory and preliminary, do not adjust for multiplicity, and may lack power due to small numbers. Furthermore, selection of treatment type within the randomized arm depends on clinical factors and such factors are adjusted for in these analyses.

Table S2B. Exploratory analyses of treatment or patient characteristics and association with IDFS within menopausal status and assigned arm

| <b>Menopausal status</b> | <b>Assigned Arm</b> | <b>Inclusion criteria</b>                         | <b>Group 1</b>                  | <b>Group 2</b>                    | <b>HR (1 vs. 2)<br/>95% CI</b> |
|--------------------------|---------------------|---------------------------------------------------|---------------------------------|-----------------------------------|--------------------------------|
| Postmenopausal           | CET                 | Received chemo in 12 months                       | Anthracycline & taxane (n=477)  | Taxane & cyclophosphamide (n=724) | 0.89<br>(0.60-1.32)            |
| Premenopausal            | CET                 | Received chemo in 12 months                       | Anthracycline & taxane (n=356)  | Taxane & cyclophosphamide (n=289) | 0.93<br>(0.50-1.72)            |
| Premenopausal            | CET                 | Received chemo in 12 months                       | No periods in 12 months (n=481) | Periods during 12 months (n=188)  | 0.82<br>(0.43-1.55)            |
| Premenopausal            | CET                 | Received chemo in 12 months & Age <50             | No periods in 12 months (n=316) | Periods during 12 months (n=145)  | 0.91<br>(0.42-1.99)            |
| Premenopausal            | ET                  | Received endocrine therapy in 12 months           | OFS in 12 months (n=144)        | No OFS in 12 months (n=594)       | 0.71<br>(0.38-1.30)            |
| Premenopausal            | ET                  | Received endocrine therapy in 12 months & Age <50 | OFS in 12 months (n=112)        | No OFS in 12 months (n=416)       | 0.60<br>(0.30-1.20)            |

All analyses are landmarked starting at 12 months post-randomization. Analyses are adjusted for age, RS, tumor size, and grade.

**Table S3.** Analysis of Invasive Disease-Free Survival in the Overall Population

Table S3A. Primary Analysis: Test of the Interaction of Chemotherapy (Predictive Effect) with Recurrence-Score

| Term                                 | Hazard ratio | 2-sided p-value | 95% CI      |
|--------------------------------------|--------------|-----------------|-------------|
| <b>Chemotherapy</b>                  | 0.67         | 0.17            | 0.38 - 1.18 |
| <b>RS (per unit change)</b>          | 1.05         | 0.0001          | 1.02 - 1.07 |
| <b>Menopausal status</b>             | 1.07         | 0.48            | 0.88 - 1.30 |
| <b>Chemotherapy x RS Interaction</b> | 1.02         | 0.35            | 0.98 - 1.05 |

RS=Recurrence-Score, CI=Confidence Interval

Table S3B. Primary Analysis: Test of the Prognostic Effect of Chemotherapy adjusting for Recurrence-Score

| Term                        | Hazard ratio | 2-sided p-value | 95% CI      |
|-----------------------------|--------------|-----------------|-------------|
| <b>Chemotherapy</b>         | 0.86         | 0.10            | 0.72 - 1.03 |
| <b>RS (per unit change)</b> | 1.05         | <0.0001         | 1.04 - 1.07 |
| <b>Menopausal status</b>    | 1.07         | 0.49            | 0.88 - 1.30 |

Table S3C. Test of the Interaction of Chemotherapy with the Stratification Factor Menopausal Status

| Term                                    | Hazard ratio | 2-sided p-value | 95% CI      |
|-----------------------------------------|--------------|-----------------|-------------|
| <b>Chemotherapy</b>                     | 0.59         | 0.002           | 0.43 - 0.83 |
| <b>RS (per unit change)</b>             | 1.05         | <0.0001         | 1.04 - 1.07 |
| <b>Menopausal status</b>                | 0.84         | 0.19            | 0.65 - 1.09 |
| <b>Chemotherapy x Menopausal Status</b> | 1.71         | 0.008           | 1.15 – 2.54 |

**Table S4.** Analysis of Invasive Disease-Free Survival in the Postmenopausal Population  
 Table S4A. Test of the Interaction of Chemotherapy (Predictive Effect) with Recurrence-Score  
 in Postmenopausal Women

| Term                                 | Hazard ratio | 2-sided p-value | 95% CI      |
|--------------------------------------|--------------|-----------------|-------------|
| <b>Chemotherapy</b>                  | 0.81         | 0.54            | 0.42 - 1.57 |
| <b>RS (per unit change)</b>          | 1.04         | 0.003           | 1.01 - 1.07 |
| <b>Chemotherapy x RS Interaction</b> | 1.01         | 0.48            | 0.97 - 1.06 |

RS=Recurrence-Score, CI=Confidence Interval

Table S4B. Test of Chemotherapy Benefit Adjusting for Recurrence-Score in Postmenopausal Women

| Term                        | Hazard ratio | 2-sided p-value | 95% CI      |
|-----------------------------|--------------|-----------------|-------------|
| <b>Chemotherapy</b>         | 1.02         | 0.89            | 0.82 - 1.26 |
| <b>RS (per unit change)</b> | 1.05         | <0.0001         | 1.03 - 1.07 |

Table S4C. Test of Chemotherapy Benefit Adjusting for Recurrence-Score and Other Prognostic Variables in a Multivariable Model for Postmenopausal Women

| Term                                    | Hazard ratio | 2-sided p-value | 95% CI      |
|-----------------------------------------|--------------|-----------------|-------------|
| <b>Chemotherapy</b>                     | 1.03         | 0.79            | 0.83 - 1.28 |
| <b>RS (per unit change)</b>             | 1.05         | <0.0001         | 1.03 - 1.07 |
| <b>Positive nodes 2 vs 1</b>            | 1.22         | 0.12            | 0.95 – 1.57 |
| <b>Positive nodes 3 vs 1</b>            | 1.55         | 0.013           | 1.10 – 2.20 |
| <b>Grade 2 vs 1</b>                     | 1.30         | 0.08            | 0.97 – 1.73 |
| <b>Grade 3 vs 1</b>                     | 1.74         | 0.003           | 1.20 – 2.53 |
| <b>Tumor size 2-5 cm vs &lt; 2 cm</b>   | 1.47         | 0.001           | 1.17 – 1.84 |
| <b>Tumor size &gt;5 cm vs &lt; 2 cm</b> | 1.96         | 0.004           | 1.24 – 3.11 |
| <b>Age (per year)</b>                   | 1.02         | 0.02            | 1.00 – 1.03 |

Harrell's c-statistic for fit = 0.63



**Table S5.** Analysis of Invasive Disease-Free Survival in the Premenopausal Population

Table 5A. Test of the Interaction of Chemotherapy (Predictive Effect) with Recurrence-Score in Premenopausal Women

| Term                                 | Hazard ratio | 2-sided p-value | 95% CI      |
|--------------------------------------|--------------|-----------------|-------------|
| <b>Chemotherapy</b>                  | 0.31         | 0.057           | 0.09 - 1.04 |
| <b>RS (per unit change)</b>          | 1.05         | 0.018           | 1.01 - 1.09 |
| <b>Chemotherapy x RS Interaction</b> | 1.04         | 0.26            | 0.97 - 1.12 |

RS=Recurrence-Score, CI=Confidence Interval

Table 5B. Test of Chemotherapy Benefit Adjusting for Recurrence-Score in Premenopausal Women

| Term                        | Hazard ratio | 2-sided p-value | 95% CI      |
|-----------------------------|--------------|-----------------|-------------|
| <b>Chemotherapy</b>         | 0.60         | 0.002           | 0.43 – 0.83 |
| <b>RS (per unit change)</b> | 1.06         | 0.0002          | 1.03 - 1.10 |

Table S5C. Test of Chemotherapy Benefit Adjusting for Recurrence-Score and Other Prognostic Variables in a Multivariable Model for Premenopausal Women

| Term                                    | Hazard ratio | 2-sided p-value | 95% CI      |
|-----------------------------------------|--------------|-----------------|-------------|
| <b>Chemotherapy</b>                     | 0.60         | 0.002           | 0.43 – 0.83 |
| <b>RS (per unit change)</b>             | 1.06         | 0.001           | 1.02 - 1.09 |
| <b>Positive nodes 2 vs 1</b>            | 1.15         | 0.46            | 0.80 – 1.67 |
| <b>Positive nodes 3 vs 1</b>            | 1.00         | 0.99            | 0.56 – 1.80 |
| <b>Grade 2 vs 1</b>                     | 1.34         | 0.21            | 0.85 – 2.12 |
| <b>Grade 3 vs 1</b>                     | 1.46         | 0.22            | 0.80 – 2.65 |
| <b>Tumor size 2-5 cm vs &lt; 2 cm</b>   | 1.52         | 0.02            | 1.08 – 2.13 |
| <b>Tumor size &gt;5 cm vs &lt; 2 cm</b> | 1.48         | 0.25            | 0.76 – 2.88 |
| <b>Age (per year)</b>                   | 0.97         | 0.03            | 0.94 - 1.00 |

Harrell's c-statistic for fit = 0.64

**Table S6. Baseline Characteristics by Menopausal Status**

|                                                                        | <b>Total<br/>(n=5018)</b> |       | <b>Premenopausal<br/>(n=1665)</b> |       | <b>Postmenopausal<br/>(n=3353)</b> |       |
|------------------------------------------------------------------------|---------------------------|-------|-----------------------------------|-------|------------------------------------|-------|
| <b>RACE</b>                                                            |                           |       |                                   |       |                                    |       |
| White                                                                  | 3295                      | 65.7% | 981                               | 58.9% | 2314                               | 69.0% |
| Black                                                                  | 251                       | 5.0%  | 57                                | 3.4%  | 194                                | 5.8%  |
| Asian                                                                  | 324                       | 6.5%  | 188                               | 11.3% | 136                                | 4.1%  |
| Other/Unknown                                                          | 1148                      | 22.9% | 439                               | 26.4% | 709                                | 21.1% |
| <b>ETHNICITY</b>                                                       |                           |       |                                   |       |                                    |       |
| Hispanic                                                               | 622                       | 12.4% | 231                               | 13.4% | 391                                | 11.7% |
| Non-Hispanic                                                           | 3426                      | 68.3% | 1071                              | 64.3% | 2355                               | 70.2% |
| Unknown                                                                | 970                       | 19.3% | 363                               | 21.8% | 607                                | 11.7% |
| <b>MEDIAN AGE (RANGE)</b>                                              | 57.5 (18.3 – 87.6)        |       | 47.3 (27.8 – 65.7)                |       | 62.9 (18.3 – 87.6)                 |       |
| <b>AGE CATEGORY</b>                                                    |                           |       |                                   |       |                                    |       |
| < 40 years                                                             | 147                       | 2.9%  | 142                               | 8.5%  | 5                                  | 0.2%  |
| 40-49 years                                                            | 1077                      | 21.5% | 1012                              | 60.8% | 65                                 | 1.9%  |
| 50-59 years                                                            | 1675                      | 33.4% | 507                               | 30.5% | 1168                               | 34.8% |
| 60-69 years                                                            | 1538                      | 30.6% | 4                                 | 0.2%  | 1534                               | 45.8% |
| ≥ 70 years                                                             | 581                       | 11.6% | 0                                 | 0%    | 581                                | 17.3% |
| <b>RECURRENCE SCORE</b>                                                |                           |       |                                   |       |                                    |       |
| 0-13                                                                   | 2147                      | 42.8% | 645                               | 38.7% | 1502                               | 44.8% |
| 14-25                                                                  | 2871                      | 57.2% | 1020                              | 61.3% | 1851                               | 55.2% |
| <b>AXILLARY SURGERY</b>                                                |                           |       |                                   |       |                                    |       |
| Axillary lymph node dissection (with or without sentinel node mapping) | 3140                      | 62.6% | 1105                              | 66.4% | 2035                               | 60.7% |
| Sentinel node biopsy without axillary lymph node dissection            | 1878                      | 37.4% | 560                               | 33.6% | 1318                               | 39.3% |
| <b>HORMONE RECEPTOR STATUS</b>                                         |                           |       |                                   |       |                                    |       |
| ER+ and PR+                                                            | 4701                      | 94.3% | 1620                              | 97.8% | 3081                               | 92.5% |
| ER+ and PR-                                                            | 286                       | 5.7%  | 37                                | 2.2%  | 249                                | 7.5%  |
| Not reported                                                           | 31                        |       |                                   |       |                                    |       |
| <b>POSITIVE NODES</b>                                                  |                           |       |                                   |       |                                    |       |
| 1 node                                                                 | 3275                      | 65.5% | 1084                              | 65.3% | 2191                               | 65.6% |
| 2 nodes                                                                | 1266                      | 25.3% | 427                               | 25.7% | 839                                | 25.1% |
| 3 nodes                                                                | 460                       | 9.2%  | 149                               | 9.0%  | 311                                | 9.3%  |
| Not reported                                                           | 17                        |       |                                   |       |                                    |       |
| <b>TUMOR SIZE</b>                                                      |                           |       |                                   |       |                                    |       |
| T1                                                                     | 2923                      | 58.3% | 938                               | 56.3% | 1985                               | 59.2% |
| T2                                                                     | 1843                      | 36.7% | 621                               | 37.3% | 1222                               | 36.4% |
| T3                                                                     | 252                       | 5.0%  | 106                               | 6.4%  | 146                                | 4.4%  |
| <b>HISTOLOGIC GRADE</b>                                                |                           |       |                                   |       |                                    |       |
| Low                                                                    | 1218                      | 24.3% | 361                               | 21.7% | 857                                | 25.6% |
| Intermediate                                                           | 3215                      | 64.3% | 1122                              | 67.6% | 2093                               | 62.6% |
| High                                                                   | 507                       | 10.1% | 159                               | 9.6%  | 348                                | 10.4% |
| Unknown                                                                | 63                        | 1.3%  | 18                                | 1.1%  | 45                                 | 1.4%  |
| Not reported                                                           | 15                        |       |                                   |       |                                    |       |

|                               | <b>Total<br/>(n=5018)</b> |       | <b>Premenopausal<br/>(n=1665)</b> |       | <b>Postmenopausal<br/>(n=3353)</b> |       |
|-------------------------------|---------------------------|-------|-----------------------------------|-------|------------------------------------|-------|
| <b>HISTOLOGY</b>              |                           |       |                                   |       |                                    |       |
| Invasive ductal carcinoma     | 3673                      | 74.6% | 1199                              | 73.2% | 2474                               | 75.3% |
| Invasive lobular carcinoma    | 674                       | 13.7% | 243                               | 14.8% | 431                                | 13.1% |
| Invasive mixed ductal/lobular | 278                       | 5.6%  | 95                                | 5.8%  | 183                                | 5.6%  |
| Other                         | 299                       | 6.1%  | 100                               | 6.1%  | 199                                | 6.1%  |
| Not reported                  | 94                        |       |                                   |       |                                    |       |
| <b>EXTRANODAL EXTENSION</b>   |                           |       |                                   |       |                                    |       |
| No/Unknown                    | 3874                      | 78.7% | 1330                              | 81.2% | 2544                               | 77.4% |
| Yes                           | 1051                      | 21.3% | 307                               | 18.8% | 744                                | 22.6% |
| Not reported                  | 93                        |       |                                   |       |                                    |       |
| <b>CLINICAL RISK</b>          |                           |       |                                   |       |                                    |       |
| High risk                     | 4182                      | 83.3% | 1427                              | 85.7% | 2755                               | 82.2% |
| Low risk                      | 836                       | 16.7% | 238                               | 14.3% | 598                                | 17.8% |

Clinical Risk: Low risk is tumor size < 2cm AND Grade 1, using a modified version of Adjuvant! Online. High risk is everything else

ER = Estrogen Receptor; PR = Progesterone Receptor

**Table S7.** Type of First Invasive Disease-Free Survival Event by Treatment Assigned for Randomized Postmenopausal Patients with Recurrence Score 25 or less (N=3,329)

| IDFS EVENT TYPE                               | ARM NAME     |            |             |            | Total |            |
|-----------------------------------------------|--------------|------------|-------------|------------|-------|------------|
|                                               | CET N = 1658 |            | ET N = 1671 |            |       |            |
|                                               | N            | Percentage | N           | Percentage | N     | Percentage |
| Any Distant Recurrence                        | 44           | 27.0%      | 46          | 27.2%      | 90    | 27.1%      |
| Local/Regional Recurrence                     | 12           | 7.4%       | 16          | 9.5%       | 28    | 8.4%       |
| Opposite Breast (recurrence or new primary)   | 12           | 7.4%       | 9           | 5.3%       | 21    | 6.3%       |
| Non-Breast New Primary                        | 44           | 27.0%      | 51          | 30.2%      | 95    | 28.6%      |
| Recurrence not Classified                     | 10           | 6.1%       | 6           | 3.5%       | 16    | 4.8%       |
| Death not due to Recurrence or Second Primary | 41           | 25.1%      | 41          | 24.3%      | 82    | 24.7%      |
| <b>Total</b>                                  | 163          |            | 169         |            | 332   |            |

CET = Chemotherapy Followed by Endocrine Therapy

ET = Endocrine Therapy Alone

IDFS = Invasive Disease-Free Survival

**Table S8.** Type of First Invasive Disease-Free Survival Event by Treatment Assigned for Randomized Premenopausal Patients with Recurrence-Score 25 or less (N=1655)

| IDFS EVENT TYPE                               | ARM NAME    |            |            |            | Total      |            |
|-----------------------------------------------|-------------|------------|------------|------------|------------|------------|
|                                               | CET N = 829 |            | ET N = 826 |            |            |            |
|                                               | N           | Percentage | N          | Percentage | N          | Percentage |
| Any Distant Recurrence                        | 27          | 47.4%      | 49         | 53.3%      | 76         | 51.0%      |
| Local/Regional Recurrence                     | 10          | 17.5%      | 18         | 19.6%      | 28         | 18.8%      |
| Opposite Breast (recurrence or new primary)   | 5           | 8.8%       | 9          | 9.8%       | 14         | 9.4%       |
| Non-Breast New Primary                        | 11          | 19.3%      | 10         | 10.9%      | 21         | 14.1%      |
| Recurrence not Classified                     | 0           | 0%         | 1          | 1.1%       | 1          | 00.7%      |
| Death not due to Recurrence or Second Primary | 4           | 7.0%       | 5          | 5.4%       | 9          | 6.0%       |
| <b>Total</b>                                  | <b>57</b>   |            | <b>92</b>  |            | <b>149</b> |            |

CET = Chemotherapy Followed by Endocrine Therapy

ET = Endocrine Therapy Alone

IDFS = Invasive Disease-Free Survival

**Table S9.** Any Invasive Disease-Free Survival Event by Treatment Assigned for Randomized Patients with Recurrence-Score 25 or less (N=4984)

| IDFS EVENT TYPE                               | ARM NAME     |            |             |            | Total |            |
|-----------------------------------------------|--------------|------------|-------------|------------|-------|------------|
|                                               | CET N = 2487 |            | ET N = 2497 |            | N     | Percentage |
|                                               | N            | Percentage | N           | Percentage |       |            |
| Any Distant Recurrence                        | 71           | 32.3%      | 95          | 36.4%      | 166   | 34.5%      |
| Local/Regional Recurrence                     | 22           | 10.0%      | 34          | 13.0%      | 56    | 11.6%      |
| Opposite Breast (recurrence or new primary)   | 17           | 7.7%       | 18          | 6.9%       | 35    | 7.3%       |
| Non-Breast New Primary                        | 55           | 25.0%      | 61          | 23.4%      | 116   | 24.1%      |
| Recurrence not Classified                     | 10           | 4.5%       | 7           | 2.7%       | 17    | 3.5%       |
| Death not due to Recurrence or Second Primary | 45           | 20.5%      | 46          | 17.6%      | 91    | 18.9%      |
| <b>Total</b>                                  | 220          |            | 261         |            | 481   |            |

CET = Chemotherapy Followed by Endocrine Therapy

ET = Endocrine Therapy Alone

IDFS = Invasive Disease-Free Survival

**Table S10.** Number of Patients with a Given Type and Grade of Adverse Event  
Postmenopausal Patients

Adverse Events Unlikely or Not Related to Treatment Excluded  
Adverse Events with No Entries for Grades 3 to 5 Have Been Suppressed  
Data as of March 26, 2021

| ADVERSE EVENTS                 | Chemo and Endocrine<br>Therapy<br>(n=1336) |    |   |   | Endocrine Therapy<br>Alone<br>(n=1577) |    |   |   |
|--------------------------------|--------------------------------------------|----|---|---|----------------------------------------|----|---|---|
|                                | Grade                                      |    |   |   | Grade                                  |    |   |   |
|                                | <=2                                        | 3  | 4 | 5 | <=2                                    | 3  | 4 | 5 |
| Abdominal pain                 | 1331                                       | 5  | 0 | 0 | 1577                                   | 0  | 0 | 0 |
| Alkaline phosphatase increased | 1335                                       | 1  | 0 | 0 | 1577                                   | 0  | 0 | 0 |
| Allergic reaction              | 1334                                       | 2  | 0 | 0 | 1576                                   | 1  | 0 | 0 |
| ALT increased                  | 1334                                       | 2  | 0 | 0 | 1576                                   | 1  | 0 | 0 |
| Anemia                         | 1321                                       | 14 | 1 | 0 | 1577                                   | 0  | 0 | 0 |
| Anorexia                       | 1334                                       | 2  | 0 | 0 | 1577                                   | 0  | 0 | 0 |
| Anxiety                        | 1334                                       | 2  | 0 | 0 | 1576                                   | 1  | 0 | 0 |
| Arthralgia                     | 1298                                       | 38 | 0 | 0 | 1546                                   | 31 | 0 | 0 |
| Atrial fibrillation            | 1333                                       | 3  | 0 | 0 | 1576                                   | 1  | 0 | 0 |
| Back pain                      | 1336                                       | 0  | 0 | 0 | 1576                                   | 1  | 0 | 0 |
| Blood/lymph disorder-Other     | 1333                                       | 3  | 0 | 0 | 1577                                   | 0  | 0 | 0 |
| Bone marrow hypocellular       | 1335                                       | 1  | 0 | 0 | 1577                                   | 0  | 0 | 0 |
| Bone pain                      | 1327                                       | 9  | 0 | 0 | 1575                                   | 2  | 0 | 0 |
| Breast infection               | 1335                                       | 1  | 0 | 0 | 1577                                   | 0  | 0 | 0 |
| Cataract                       | 1336                                       | 0  | 0 | 0 | 1576                                   | 1  | 0 | 0 |
| Catheter related infection     | 1335                                       | 0  | 1 | 0 | 1577                                   | 0  | 0 | 0 |
| CD4 lymphocytes decreased      | 1334                                       | 2  | 0 | 0 | 1577                                   | 0  | 0 | 0 |
| Chest wall pain                | 1336                                       | 0  | 0 | 0 | 1576                                   | 1  | 0 | 0 |
| Colitis                        | 1333                                       | 3  | 0 | 0 | 1577                                   | 0  | 0 | 0 |
| Constipation                   | 1333                                       | 3  | 0 | 0 | 1577                                   | 0  | 0 | 0 |
| Dehydration                    | 1327                                       | 9  | 0 | 0 | 1577                                   | 0  | 0 | 0 |
| Depression                     | 1333                                       | 3  | 0 | 0 | 1573                                   | 4  | 0 | 0 |
| Dermatitis radiation           | 1334                                       | 2  | 0 | 0 | 1575                                   | 2  | 0 | 0 |
| Device related infection       | 1334                                       | 1  | 1 | 0 | 1577                                   | 0  | 0 | 0 |
| Diarrhea                       | 1311                                       | 25 | 0 | 0 | 1575                                   | 2  | 0 | 0 |
| Dizziness                      | 1334                                       | 2  | 0 | 0 | 1576                                   | 1  | 0 | 0 |
| Dry mouth                      | 1335                                       | 1  | 0 | 0 | 1577                                   | 0  | 0 | 0 |
| Dyspareunia                    | 1335                                       | 1  | 0 | 0 | 1576                                   | 1  | 0 | 0 |
| Dyspnea                        | 1334                                       | 2  | 0 | 0 | 1577                                   | 0  | 0 | 0 |
| Ear pain                       | 1334                                       | 2  | 0 | 0 | 1577                                   | 0  | 0 | 0 |
| Edema limbs                    | 1335                                       | 1  | 0 | 0 | 1577                                   | 0  | 0 | 0 |
| Ejection fraction decreased    | 1335                                       | 0  | 1 | 0 | 1577                                   | 0  | 0 | 0 |
| Erythroderma                   | 1335                                       | 1  | 0 | 0 | 1576                                   | 1  | 0 | 0 |
| Esophagitis                    | 1334                                       | 2  | 0 | 0 | 1577                                   | 0  | 0 | 0 |
| Fatigue                        | 1295                                       | 41 | 0 | 0 | 1570                                   | 7  | 0 | 0 |

| ADVERSE EVENTS                | Chemo and Endocrine Therapy<br>(n=1336) |    |    |   | Endocrine Therapy Alone<br>(n=1577) |    |   |   |
|-------------------------------|-----------------------------------------|----|----|---|-------------------------------------|----|---|---|
|                               | Grade                                   |    |    |   | Grade                               |    |   |   |
|                               | <=2                                     | 3  | 4  | 5 | <=2                                 | 3  | 4 | 5 |
| Febrile neutropenia           | 1282                                    | 42 | 12 | 0 | 1576                                | 0  | 1 | 0 |
| Fever                         | 1334                                    | 1  | 1  | 0 | 1577                                | 0  | 0 | 0 |
| Flank pain                    | 1335                                    | 1  | 0  | 0 | 1577                                | 0  | 0 | 0 |
| Flu like symptoms             | 1335                                    | 1  | 0  | 0 | 1577                                | 0  | 0 | 0 |
| Gastric hemorrhage            | 1335                                    | 1  | 0  | 0 | 1577                                | 0  | 0 | 0 |
| Gastric ulcer                 | 1335                                    | 1  | 0  | 0 | 1577                                | 0  | 0 | 0 |
| Gen disorders/admin site cond | 1334                                    | 2  | 0  | 0 | 1577                                | 0  | 0 | 0 |
| Generalized muscle weakness   | 1332                                    | 4  | 0  | 0 | 1577                                | 0  | 0 | 0 |
| GGT increased                 | 1335                                    | 1  | 0  | 0 | 1577                                | 0  | 0 | 0 |
| GI disorders-Other, specify   | 1335                                    | 0  | 0  | 1 | 1577                                | 0  | 0 | 0 |
| Hand-Foot syndrome            | 1330                                    | 6  | 0  | 0 | 1577                                | 0  | 0 | 0 |
| Headache                      | 1331                                    | 5  | 0  | 0 | 1577                                | 0  | 0 | 0 |
| Heart failure                 | 1335                                    | 1  | 0  | 0 | 1577                                | 0  | 0 | 0 |
| Hematuria                     | 1335                                    | 1  | 0  | 0 | 1577                                | 0  | 0 | 0 |
| Hot flashes                   | 1332                                    | 4  | 0  | 0 | 1565                                | 12 | 0 | 0 |
| Hyperglycemia                 | 1324                                    | 12 | 0  | 0 | 1576                                | 1  | 0 | 0 |
| Hypertension                  | 1330                                    | 6  | 0  | 0 | 1571                                | 6  | 0 | 0 |
| Hypokalemia                   | 1331                                    | 5  | 0  | 0 | 1577                                | 0  | 0 | 0 |
| Hyponatremia                  | 1334                                    | 2  | 0  | 0 | 1577                                | 0  | 0 | 0 |
| Hypotension                   | 1334                                    | 2  | 0  | 0 | 1576                                | 1  | 0 | 0 |
| Infections/infestations-Other | 1334                                    | 2  | 0  | 0 | 1577                                | 0  | 0 | 0 |
| INR increased                 | 1336                                    | 0  | 0  | 0 | 1576                                | 1  | 0 | 0 |
| Insomnia                      | 1330                                    | 6  | 0  | 0 | 1573                                | 4  | 0 | 0 |
| Kidney infection              | 1335                                    | 1  | 0  | 0 | 1577                                | 0  | 0 | 0 |
| Leukocytosis                  | 1333                                    | 3  | 0  | 0 | 1577                                | 0  | 0 | 0 |
| Localized edema               | 1335                                    | 1  | 0  | 0 | 1577                                | 0  | 0 | 0 |
| Lung infection                | 1330                                    | 4  | 2  | 0 | 1577                                | 0  | 0 | 0 |
| LV systolic dysfunction       | 1335                                    | 1  | 0  | 0 | 1577                                | 0  | 0 | 0 |
| Lymphedema                    | 1336                                    | 0  | 0  | 0 | 1576                                | 1  | 0 | 0 |
| Lymphocyte count decreased    | 1318                                    | 17 | 1  | 0 | 1577                                | 0  | 0 | 0 |
| MS/connective tissue disorder | 1335                                    | 1  | 0  | 0 | 1577                                | 0  | 0 | 0 |
| Mucositis oral                | 1316                                    | 20 | 0  | 0 | 1577                                | 0  | 0 | 0 |
| Myalgia                       | 1316                                    | 20 | 0  | 0 | 1569                                | 8  | 0 | 0 |
| Myocardial infarction         | 1334                                    | 2  | 0  | 0 | 1577                                | 0  | 0 | 0 |
| Nausea                        | 1322                                    | 14 | 0  | 0 | 1577                                | 0  | 0 | 0 |
| Neck pain                     | 1334                                    | 2  | 0  | 0 | 1577                                | 0  | 0 | 0 |
| Neoplasms, all                | 1334                                    | 1  | 1  | 0 | 1577                                | 0  | 0 | 0 |
| Nervous sys disorders-Other   | 1335                                    | 1  | 0  | 0 | 1577                                | 0  | 0 | 0 |
| Neutrophil count decreased    | 1230                                    | 38 | 68 | 0 | 1577                                | 0  | 0 | 0 |
| Osteoporosis                  | 1335                                    | 1  | 0  | 0 | 1577                                | 0  | 0 | 0 |
| Pain                          | 1335                                    | 1  | 0  | 0 | 1577                                | 0  | 0 | 0 |
| Pain in extremity             | 1336                                    | 0  | 0  | 0 | 1576                                | 1  | 0 | 0 |



| ADVERSE EVENTS                      | Chemo and Endocrine Therapy<br>(n=1336) |     |    |   | Endocrine Therapy Alone<br>(n=1577) |    |   |   |
|-------------------------------------|-----------------------------------------|-----|----|---|-------------------------------------|----|---|---|
|                                     | Grade                                   |     |    |   | Grade                               |    |   |   |
|                                     | <=2                                     | 3   | 4  | 5 | <=2                                 | 3  | 4 | 5 |
| Paresthesia                         | 1334                                    | 2   | 0  | 0 | 1577                                | 0  | 0 | 0 |
| Peripheral ischemia                 | 1336                                    | 0   | 0  | 0 | 1576                                | 1  | 0 | 0 |
| Peripheral motor neuropathy         | 1334                                    | 2   | 0  | 0 | 1577                                | 0  | 0 | 0 |
| Peripheral sensory neuropathy       | 1317                                    | 18  | 1  | 0 | 1575                                | 2  | 0 | 0 |
| Platelet count decreased            | 1334                                    | 2   | 0  | 0 | 1577                                | 0  | 0 | 0 |
| Pleuritic pain                      | 1335                                    | 1   | 0  | 0 | 1577                                | 0  | 0 | 0 |
| Pneumonitis                         | 1330                                    | 6   | 0  | 0 | 1577                                | 0  | 0 | 0 |
| Pruritus                            | 1333                                    | 3   | 0  | 0 | 1576                                | 1  | 0 | 0 |
| Rash maculo-papular                 | 1331                                    | 5   | 0  | 0 | 1575                                | 2  | 0 | 0 |
| Renal/urinary disorders-Other       | 1335                                    | 1   | 0  | 0 | 1577                                | 0  | 0 | 0 |
| Repro system/breast ds-Oth          | 1335                                    | 1   | 0  | 0 | 1577                                | 0  | 0 | 0 |
| ROM decreased                       | 1335                                    | 1   | 0  | 0 | 1577                                | 0  | 0 | 0 |
| RT recall reaction, derm            | 1334                                    | 2   | 0  | 0 | 1577                                | 0  | 0 | 0 |
| Secondary Leukemia                  | 1335                                    | 0   | 1  | 0 | 1577                                | 0  | 0 | 0 |
| Sepsis                              | 1331                                    | 0   | 4  | 1 | 1577                                | 0  | 0 | 0 |
| Sinus tachycardia                   | 1335                                    | 1   | 0  | 0 | 1577                                | 0  | 0 | 0 |
| Skin infection                      | 1331                                    | 5   | 0  | 0 | 1577                                | 0  | 0 | 0 |
| Skin ulceration                     | 1335                                    | 0   | 1  | 0 | 1577                                | 0  | 0 | 0 |
| Skin/subq tissue ds-Other           | 1331                                    | 5   | 0  | 0 | 1573                                | 4  | 0 | 0 |
| Stroke                              | 1334                                    | 1   | 1  | 0 | 1575                                | 1  | 0 | 1 |
| Supraventricular tachycardia        | 1335                                    | 1   | 0  | 0 | 1576                                | 1  | 0 | 0 |
| Syncope                             | 1333                                    | 3   | 0  | 0 | 1577                                | 0  | 0 | 0 |
| Thromboembolic event                | 1331                                    | 4   | 1  | 0 | 1576                                | 1  | 0 | 0 |
| Tinnitus                            | 1335                                    | 1   | 0  | 0 | 1577                                | 0  | 0 | 0 |
| Typhlitis                           | 1335                                    | 0   | 0  | 1 | 1577                                | 0  | 0 | 0 |
| Upper GI hemorrhage                 | 1335                                    | 0   | 1  | 0 | 1577                                | 0  | 0 | 0 |
| Upper respiratory infection         | 1335                                    | 1   | 0  | 0 | 1577                                | 0  | 0 | 0 |
| Urinary tract infection             | 1332                                    | 4   | 0  | 0 | 1577                                | 0  | 0 | 0 |
| Urticaria                           | 1335                                    | 1   | 0  | 0 | 1577                                | 0  | 0 | 0 |
| Vaginal dryness                     | 1336                                    | 0   | 0  | 0 | 1573                                | 4  | 0 | 0 |
| Vaginal hemorrhage                  | 1336                                    | 0   | 0  | 0 | 1576                                | 1  | 0 | 0 |
| Vomiting                            | 1322                                    | 14  | 0  | 0 | 1577                                | 0  | 0 | 0 |
| Watering eyes                       | 1334                                    | 2   | 0  | 0 | 1577                                | 0  | 0 | 0 |
| Weight gain                         | 1334                                    | 2   | 0  | 0 | 1577                                | 0  | 0 | 0 |
| Weight loss                         | 1334                                    | 2   | 0  | 0 | 1577                                | 0  | 0 | 0 |
| White blood cell decreased          | 1287                                    | 31  | 18 | 0 | 1577                                | 0  | 0 | 0 |
| Wound dehiscence                    | 1335                                    | 1   | 0  | 0 | 1577                                | 0  | 0 | 0 |
| <b>MAX. GRADE ANY ADVERSE EVENT</b> | 967                                     | 274 | 92 | 3 | 1488                                | 87 | 1 | 1 |

**Table S11.** Number of Patients with a Given Type and Grade of Adverse Event  
Premenopausal Patients

Adverse Events Unlikely or Not Related to Treatment Excluded  
Adverse Events with No Entries for Grades 3 to 5 Have Been Suppressed  
Data as of March 26, 2021

| ADVERSE EVENTS             | Chemo and Endocrine<br>Therapy<br>(n=717) |    |   |   | Endocrine Therapy<br>Alone<br>(n=751) |   |   |   |
|----------------------------|-------------------------------------------|----|---|---|---------------------------------------|---|---|---|
|                            | Grade                                     |    |   |   | Grade                                 |   |   |   |
|                            | <=2                                       | 3  | 4 | 5 | <=2                                   | 3 | 4 | 5 |
| Abdominal pain             | 715                                       | 2  | 0 | 0 | 751                                   | 0 | 0 | 0 |
| Acute kidney injury        | 716                                       | 1  | 0 | 0 | 751                                   | 0 | 0 | 0 |
| Allergic reaction          | 713                                       | 4  | 0 | 0 | 751                                   | 0 | 0 | 0 |
| ALT increased              | 715                                       | 2  | 0 | 0 | 750                                   | 1 | 0 | 0 |
| Anemia                     | 712                                       | 4  | 1 | 0 | 751                                   | 0 | 0 | 0 |
| Arthralgia                 | 710                                       | 7  | 0 | 0 | 747                                   | 4 | 0 | 0 |
| AST increased              | 717                                       | 0  | 0 | 0 | 750                                   | 1 | 0 | 0 |
| Back pain                  | 716                                       | 1  | 0 | 0 | 751                                   | 0 | 0 | 0 |
| Blood/lymph disorder-Other | 716                                       | 1  | 0 | 0 | 751                                   | 0 | 0 | 0 |
| Bone pain                  | 711                                       | 6  | 0 | 0 | 748                                   | 3 | 0 | 0 |
| Breast infection           | 716                                       | 1  | 0 | 0 | 751                                   | 0 | 0 | 0 |
| Bronchial infection        | 716                                       | 1  | 0 | 0 | 751                                   | 0 | 0 | 0 |
| Catheter related infection | 715                                       | 2  | 0 | 0 | 751                                   | 0 | 0 | 0 |
| Chest pain - cardiac       | 716                                       | 1  | 0 | 0 | 751                                   | 0 | 0 | 0 |
| Colitis                    | 715                                       | 2  | 0 | 0 | 751                                   | 0 | 0 | 0 |
| Constipation               | 716                                       | 1  | 0 | 0 | 751                                   | 0 | 0 | 0 |
| Death NOS                  | 717                                       | 0  | 0 | 0 | 750                                   | 0 | 0 | 1 |
| Dehydration                | 715                                       | 2  | 0 | 0 | 751                                   | 0 | 0 | 0 |
| Depression                 | 717                                       | 0  | 0 | 0 | 749                                   | 2 | 0 | 0 |
| Dermatitis radiation       | 715                                       | 2  | 0 | 0 | 749                                   | 2 | 0 | 0 |
| Device related infection   | 715                                       | 2  | 0 | 0 | 751                                   | 0 | 0 | 0 |
| Diarrhea                   | 711                                       | 6  | 0 | 0 | 750                                   | 1 | 0 | 0 |
| Dizziness                  | 716                                       | 1  | 0 | 0 | 751                                   | 0 | 0 | 0 |
| Dry skin                   | 716                                       | 1  | 0 | 0 | 751                                   | 0 | 0 | 0 |
| Dyspepsia                  | 716                                       | 1  | 0 | 0 | 751                                   | 0 | 0 | 0 |
| Erythema multiforme        | 716                                       | 1  | 0 | 0 | 751                                   | 0 | 0 | 0 |
| Esophagitis                | 716                                       | 1  | 0 | 0 | 751                                   | 0 | 0 | 0 |
| Fatigue                    | 711                                       | 6  | 0 | 0 | 749                                   | 2 | 0 | 0 |
| Febrile neutropenia        | 689                                       | 27 | 1 | 0 | 751                                   | 0 | 0 | 0 |
| Fever                      | 716                                       | 1  | 0 | 0 | 751                                   | 0 | 0 | 0 |
| Gastrointestinal pain      | 716                                       | 1  | 0 | 0 | 751                                   | 0 | 0 | 0 |
| GGT increased              | 716                                       | 1  | 0 | 0 | 751                                   | 0 | 0 | 0 |
| Hand-Foot syndrome         | 716                                       | 1  | 0 | 0 | 751                                   | 0 | 0 | 0 |
| Headache                   | 715                                       | 2  | 0 | 0 | 750                                   | 1 | 0 | 0 |
| Hemorrhoids                | 716                                       | 1  | 0 | 0 | 751                                   | 0 | 0 | 0 |

| ADVERSE EVENTS                | Chemo and Endocrine Therapy<br>(n=717) |    |    |   | Endocrine Therapy Alone<br>(n=751) |   |   |   |
|-------------------------------|----------------------------------------|----|----|---|------------------------------------|---|---|---|
|                               | Grade                                  |    |    |   | Grade                              |   |   |   |
|                               | <=2                                    | 3  | 4  | 5 | <=2                                | 3 | 4 | 5 |
| Hot flashes                   | 709                                    | 8  | 0  | 0 | 749                                | 2 | 0 | 0 |
| Hyperglycemia                 | 713                                    | 4  | 0  | 0 | 751                                | 0 | 0 | 0 |
| Hyperhidrosis                 | 716                                    | 1  | 0  | 0 | 751                                | 0 | 0 | 0 |
| Hypertension                  | 716                                    | 1  | 0  | 0 | 751                                | 0 | 0 | 0 |
| Hypotension                   | 716                                    | 1  | 0  | 0 | 751                                | 0 | 0 | 0 |
| Infections/infestations-Other | 716                                    | 1  | 0  | 0 | 751                                | 0 | 0 | 0 |
| Injection site reaction       | 716                                    | 1  | 0  | 0 | 751                                | 0 | 0 | 0 |
| Insomnia                      | 714                                    | 3  | 0  | 0 | 751                                | 0 | 0 | 0 |
| Irregular menstruation        | 714                                    | 3  | 0  | 0 | 750                                | 1 | 0 | 0 |
| Leukocytosis                  | 716                                    | 0  | 1  | 0 | 751                                | 0 | 0 | 0 |
| Lipase increased              | 716                                    | 1  | 0  | 0 | 751                                | 0 | 0 | 0 |
| Localized edema               | 717                                    | 0  | 0  | 0 | 750                                | 1 | 0 | 0 |
| Lymphedema                    | 716                                    | 1  | 0  | 0 | 751                                | 0 | 0 | 0 |
| Lymphocyte count decreased    | 715                                    | 2  | 0  | 0 | 751                                | 0 | 0 | 0 |
| Menorrhagia                   | 717                                    | 0  | 0  | 0 | 750                                | 1 | 0 | 0 |
| Mucositis oral                | 714                                    | 3  | 0  | 0 | 751                                | 0 | 0 | 0 |
| Muscle weakness lower limb    | 716                                    | 1  | 0  | 0 | 751                                | 0 | 0 | 0 |
| Myalgia                       | 713                                    | 4  | 0  | 0 | 751                                | 0 | 0 | 0 |
| Myelitis                      | 716                                    | 1  | 0  | 0 | 751                                | 0 | 0 | 0 |
| Nausea                        | 710                                    | 7  | 0  | 0 | 751                                | 0 | 0 | 0 |
| Neoplasms, all                | 716                                    | 1  | 0  | 0 | 751                                | 0 | 0 | 0 |
| Neutrophil count decreased    | 674                                    | 19 | 24 | 0 | 750                                | 1 | 0 | 0 |
| Pain                          | 716                                    | 1  | 0  | 0 | 751                                | 0 | 0 | 0 |
| Pain in extremity             | 715                                    | 2  | 0  | 0 | 751                                | 0 | 0 | 0 |
| Peripheral motor neuropathy   | 715                                    | 1  | 1  | 0 | 751                                | 0 | 0 | 0 |
| Peripheral sensory neuropathy | 715                                    | 2  | 0  | 0 | 751                                | 0 | 0 | 0 |
| Platelet count decreased      | 716                                    | 1  | 0  | 0 | 751                                | 0 | 0 | 0 |
| Pneumonitis                   | 715                                    | 2  | 0  | 0 | 751                                | 0 | 0 | 0 |
| Premature menopause           | 716                                    | 1  | 0  | 0 | 751                                | 0 | 0 | 0 |
| Pruritus                      | 715                                    | 2  | 0  | 0 | 751                                | 0 | 0 | 0 |
| Rash acneiform                | 716                                    | 1  | 0  | 0 | 751                                | 0 | 0 | 0 |
| Rash maculo-papular           | 714                                    | 3  | 0  | 0 | 751                                | 0 | 0 | 0 |
| Secondary Leukemia            | 715                                    | 0  | 1  | 1 | 751                                | 0 | 0 | 0 |
| Skin infection                | 713                                    | 4  | 0  | 0 | 751                                | 0 | 0 | 0 |
| Skin/subq tissue ds-Other     | 717                                    | 0  | 0  | 0 | 750                                | 1 | 0 | 0 |
| Stroke                        | 717                                    | 0  | 0  | 0 | 750                                | 0 | 0 | 1 |
| Suicidal ideation             | 716                                    | 1  | 0  | 0 | 751                                | 0 | 0 | 0 |
| Surg/medical procedures-Oth   | 715                                    | 2  | 0  | 0 | 747                                | 4 | 0 | 0 |
| Thromboembolic event          | 713                                    | 3  | 1  | 0 | 748                                | 3 | 0 | 0 |
| Urticaria                     | 714                                    | 3  | 0  | 0 | 751                                | 0 | 0 | 0 |
| Uterine hemorrhage            | 717                                    | 0  | 0  | 0 | 750                                | 1 | 0 | 0 |
| Vaginal hemorrhage            | 716                                    | 1  | 0  | 0 | 751                                | 0 | 0 | 0 |

| <b>ADVERSE EVENTS</b>               | <b>Chemo and Endocrine Therapy<br/>(n=717)</b> |          |          |          | <b>Endocrine Therapy Alone<br/>(n=751)</b> |          |          |          |
|-------------------------------------|------------------------------------------------|----------|----------|----------|--------------------------------------------|----------|----------|----------|
|                                     | <b>Grade</b>                                   |          |          |          | <b>Grade</b>                               |          |          |          |
|                                     | <b>&lt;=2</b>                                  | <b>3</b> | <b>4</b> | <b>5</b> | <b>&lt;=2</b>                              | <b>3</b> | <b>4</b> | <b>5</b> |
| Vascular access complication        | 716                                            | 1        | 0        | 0        | 751                                        | 0        | 0        | 0        |
| Vomiting                            | 712                                            | 5        | 0        | 0        | 751                                        | 0        | 0        | 0        |
| Watering eyes                       | 715                                            | 2        | 0        | 0        | 751                                        | 0        | 0        | 0        |
| Weight gain                         | 715                                            | 2        | 0        | 0        | 750                                        | 1        | 0        | 0        |
| White blood cell decreased          | 701                                            | 12       | 4        | 0        | 751                                        | 0        | 0        | 0        |
| <b>MAX. GRADE ANY ADVERSE EVENT</b> | 574                                            | 111      | 31       | 1        | 723                                        | 27       | 0        | 1        |
